# Supplementary material
Source: PubMed Central journal article supplement (PMC5866052)
Supplement: NIHMS832407-supplement-Supplement_4.pdf [file NIHMS832407-supplement-Supplement_4.pdf]

# Evidence-based Medicine (EBM) Educational Prescriptions

## Grader End-of-Year Evaluation Questionnaire

Please read:

**Thank you for your participation over the last year in our new evidence-based medicine (EBM) curriculum – the EBM Educational Prescriptions. The primary purpose for this evaluation questionnaire is to provide us with the information necessary to optimize the MSCE educational program. Please answer all the questions below.**

- 1) Do you feel that you were adequately prepared to grade educational prescriptions?  
 Definitely no  Probably no  Neutral  Probably yes  Definitely yes
- 2) Did the online training module provide adequate training for using the educational prescription website?  
 Definitely no  Probably no  Neutral  Probably yes  Definitely yes
- 3) Did the online training module provide adequate training for grading educational prescriptions?  
 Definitely no  Probably no  Neutral  Probably yes  Definitely yes
- 4) Do you feel that the educational prescription was a valuable tool in evaluating learners' evidence-based medicine skills?  
 Definitely no  Probably no  Neutral  Probably yes  Definitely yes
- 5) Do you feel that the educational prescription strengthened learners' evidence-based medicine skills over time?  
 Definitely no  Probably no  Neutral  Probably yes  Definitely yes
- 6) Do you feel like your students' educational prescriptions improved over time?  
 Definitely no  Probably no  Neutral  Probably yes  Definitely yes
- 7) Do you feel that there was enough time for you to evaluate students' educational prescriptions?  
 Definitely no  Probably no  Neutral  Probably yes  Definitely yes
- 8) How often did you meet in person with students whose EBM educational prescriptions you evaluated?  
 Never  Once  Twice  Three times  More than three times
- 9) Overall, do you think that evaluating educational prescriptions was a valuable experience for you?  
 Definitely no  Probably no  Neutral  Probably yes  Definitely yes
- 9.1 Please explain why or why not?
- 10) Overall, do you think that evaluating educational prescriptions was a valuable addition to your education in the MSCE program?  
 Definitely no  Probably no  Neutral  Probably yes  Definitely yes
- 10.1 Please explain why or why not?
- 11) Were any of the following barriers to your evaluation of student educational prescriptions?  
(Check all that apply)

11A  Usability of the educational prescription website

- 11B  Your comfort with how to ask clinical questions
- 11C  Your comfort with the use of evidence resources
- 11D  Your comfort with how to critically evaluate evidence
- 11E  Time
- 11F  Disagreement with the grading guidelines embedded in the website
- 11G  Learners evidence-based practice skills
- 11H  Your evidence-based practice skills

11.1 Comments.

Please help us optimize the overall program by providing at least one suggestion for each of the following issues:

- 12) Facilitating the fellows completion of the educational prescriptions in a timely manner.
- 13) Overcoming other barriers encountered.
- 14) Other benefits you realized when evaluating educational prescriptions.
- 15) Other suggestions for improving the educational prescription process or website.

- 16) Would you recommend that this experience be continued as part of the MSCE training?  
 Definitely no  Probably no  Neutral  Probably yes  Definitely yes

16.1 Comments.

## Research Study

**Because this program is new and a novel approach to the teaching of EBM, we plan to examine the aggregate data from this evaluation and other information about the performance of the medical students as a research project to assess the feasibility and validity of EBM Educational Prescriptions for teaching and evaluating medical student EBM skills. Data from the Educational Prescriptions you graded and this survey will be used in the analysis. We will also include an aggregated summary of learner and grader general demographic information (medical specialty [i.e. peds or adult], gender, age, and graduate degrees). The only risk of this study to you is loss of confidentiality. To protect your confidentiality all data will be coded prior to use so that your names are not attached to the data. Also, data will only be presented in aggregate form with no categories with less than 5 members. The faculty involved in the study are co-PIs: Craig A Umscheid, MD, MSCE, Jennifer R Kogan, MD and David Feldstein, MD**

**If you are interested in more information about the study or if you do not want your answers to this survey or demographic information used in the study, please contact me with your request.**

**Thank you.**

**Craig A. Umscheid, MD, MSCE**

**Assistant Professor of Medicine and Epidemiology**  
**Director, Clinical Decision Making Course**  
[craig.umscheid@uphs.upenn.edu](mailto:craig.umscheid@uphs.upenn.edu)
